# Supplementary material for: Delay of Morphine Tolerance by Palmitoylethanolamide
Source: Hindawi journal article supplement (doi:10.1155/2015/894732), 2015-01-01

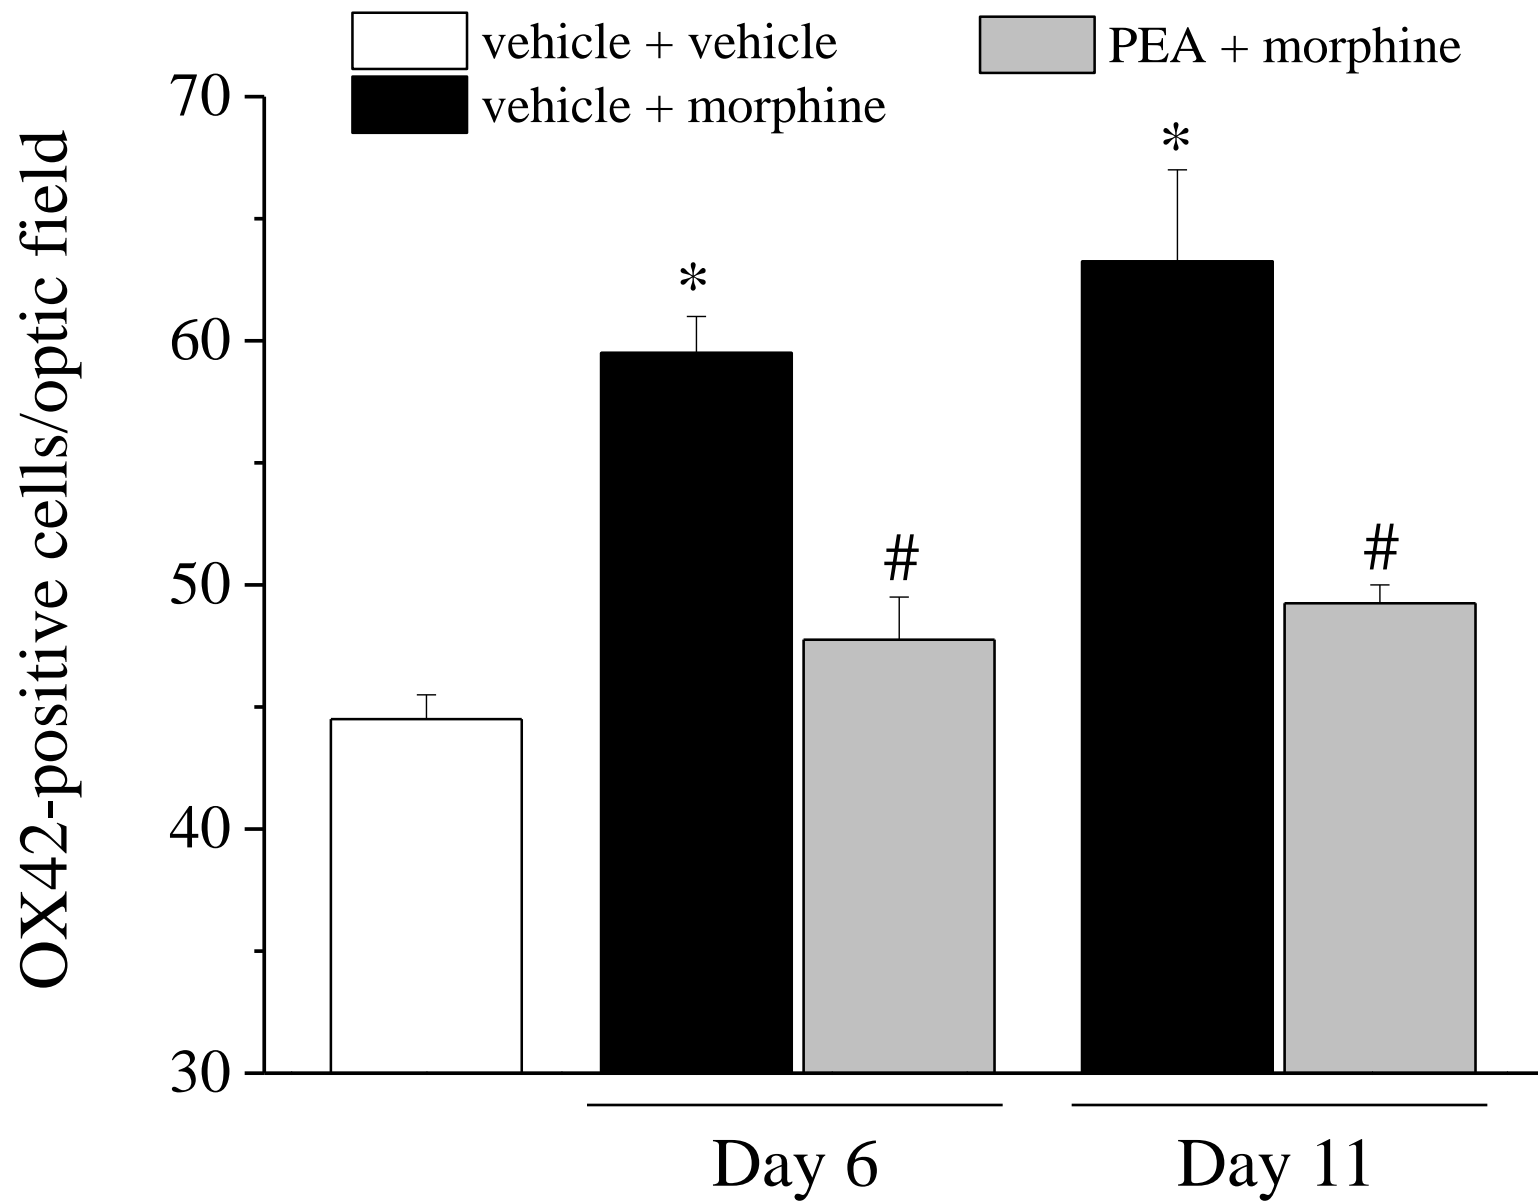

Supplement: f1 [file 894732.f1.pdf]
